# Supplementary material for: A novel electrochemical redox method for the simultaneous recovery of spent lithium-ion battery cathodes and anodes
Source: Royal Society of Chemistry journal article supplement (doi:10.1039/d3gc00171g), 2023-01-01
Supplement: d3gc00171g1.pdf [file d3gc00171g1.pdf]

Electronic Supplementary Material (ESI)

For

**Novel electrochemical redox method for simultaneous recovery of  
spent lithium-ion batteries cathodes and anodes**

Jiao Kong,<sup>a</sup> Shiyu Zhou,<sup>a</sup> Ting He,<sup>a</sup> Shuai Gu<sup>\*a, b</sup> and Jianguo Yu<sup>\*a, b</sup>

<sup>a</sup> *National Engineering Research Centre for Integrated Utilization of Salt Lake Resources, East China University of Science and Technology, Shanghai, 200237, China.*

<sup>b</sup> *Joint International Laboratory for Potassium and Lithium Strategic Resources, East China University of Science and Technology, Shanghai, 200237, China.*

## Table of Contents

Fig. S1. SEM-EDX images of the spent LIBs anode materials

Fig. S2. The flowchart of the graphite purification process

Table S1. Corrosion current ( $i_0$ ), corrosion potential ( $E_c$ ), and cathodic/ anodic charge transfer coefficient ( $\alpha_c/\alpha_a$ ) at different acid concentrations

Fig.S3. Kinetic fitting of Li (a), Co (b), and Al (c) at -0.15 V, in the 0.5 M H<sub>2</sub>SO<sub>4</sub> solution at different temperatures

Table S2. A comprehensive summary of the kinetic models

Fig.S4. SEM-EDX analysis of spent cathodes (a, b) and anodes (c, d).

Fig.S5. The leaching ratios of (a) Li, Mn, Al, (b) Co, Ni under the optimum conditions (-0.15 V, 0.5M H<sub>2</sub>SO<sub>4</sub>, 400 rpm, 30 °C)

Fig.S6. the cell potential comparison for Cu foil as the anode and titanium mesh as the anode.

Fig.S7. SEM-EDX images of the cathode residuals

Fig.S8. XPS survey(a) and the deconvoluted high-resolution XPS curves of Co 2p (b) and O 1s (c) of the cathode residuals

Fig.S9. Characterization of recovered conductive agent (a) SEM image, (b)size distributions

Fig.S10. SEM-EDX analysis of electrodeposited Cu

The calculation for life cycle and economic assessment

Fig.S11. System boundaries for LCA research of the proposed (a), and the conventional electrochemical process (b)

Table S3. EDX results of the spent LIBs cathode materials.

Table S4. EDX results of the spent LIBs anode materials.

Table S5. Material and energy input/output list

Table S6. Detailed energy input/output list

Table S7. CMP and data sources of each item

Table S8. The environmental impact of electricity in the electrochemical process proposed in this study and the traditional method

Table S9. The environmental impact of residue in the electrochemical process proposed in this study and the traditional method

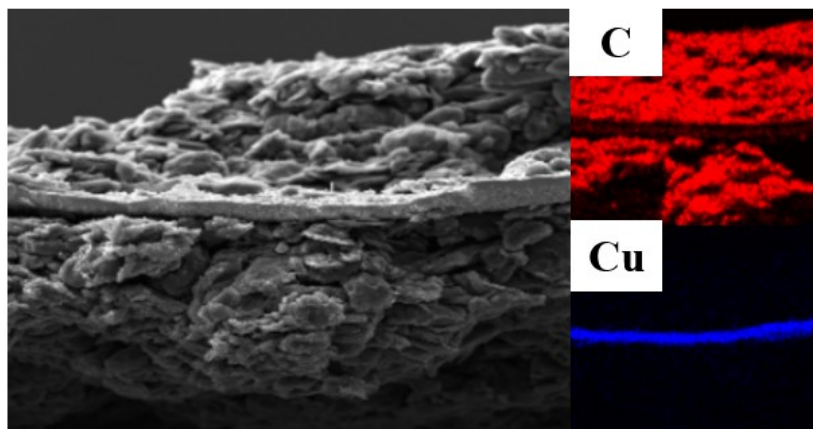

Fig. S1 SEM-EDX images of the spent LIBs anode materials.

**The graphite recycled from the sulfuric acid solution**

↓  
**Impurities removal with deionized water**

↓  
**Binder removal with NMP**

↓  
**Drying**

**The purified graphite**

↓  
**Remanufacture of new anode material**

Fig. S2 The flowchart of the graphite purification process.

Table S1 Corrosion current( $i_0$ ), corrosion potential ( $E_c$ ), and cathodic/ anodic charge transfer coefficient ( $\alpha_c/\alpha_a$ ) at different acid concentrations.

| Condition                                                                  | $i_0$ (A/cm <sup>2</sup> ) | $E_c$ (V) | $\alpha_c$ | $\alpha_a$ |
|----------------------------------------------------------------------------|----------------------------|-----------|------------|------------|
| 0.1M H <sub>2</sub> SO <sub>4</sub> +1.9M Na <sub>2</sub> SO <sub>4</sub>  | 3.98*10 <sup>-9</sup>      | 0.67      | 0.3323     | 0.6787     |
| 0.5M H <sub>2</sub> SO <sub>4</sub> + 1.5M Na <sub>2</sub> SO <sub>4</sub> | 3.16*10 <sup>-7</sup>      | 0.76      | 0.2483     | 0.8074     |
| 1M H <sub>2</sub> SO <sub>4</sub> + 1M Na <sub>2</sub> SO <sub>4</sub>     | 1*10 <sup>-6</sup>         | 0.77      | 0.2814     | 0.7045     |
| 2M H <sub>2</sub> SO <sub>4</sub>                                          | 1.25*10 <sup>-6</sup>      | 0.81      | 0.1919     | 0.8153     |

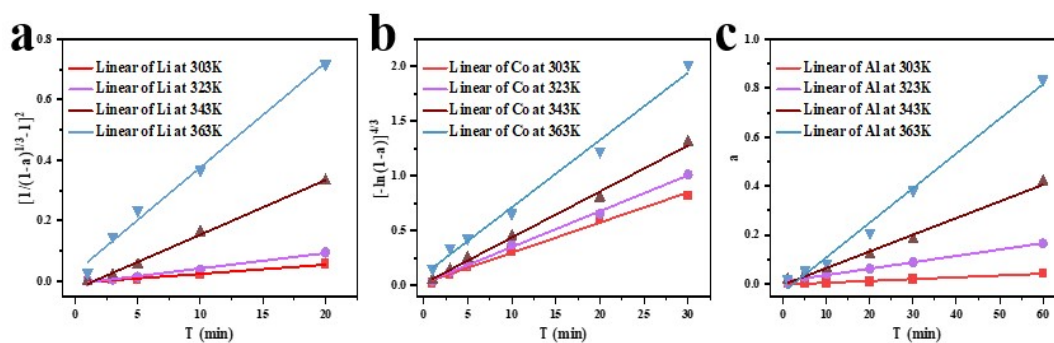

Fig.S3 Kinetic fitting of Li (a), Co (b), and Al (c) at -0.15 V, in the 0.5 M H<sub>2</sub>SO<sub>4</sub> solution at different temperatures.

Table S2 A comprehensive summary of the kinetic models.

| No.             | Kinetic models                                        | Name                                                |
|-----------------|-------------------------------------------------------|-----------------------------------------------------|
| <b>D1</b>       | $kt = \alpha^2$                                       | One-dimensional diffusion model                     |
| <b>D2</b>       | $kt = (1-\alpha)\ln(1-\alpha)+\alpha$                 | Two-dimensional diffusion model                     |
| <b>D3</b>       | $kt = [1-(1-\alpha)^{1/3}]^2$                         | Three-dimensional diffusion model<br>(Jander)       |
| <b>D4</b>       | $kt = [1-(2\alpha/3)]-(1-\alpha)^{2/3}$               | Ginstling-Brounshtein model                         |
| <b>D5</b>       | $kt = [1/(1-\alpha)^{1/3}-1]^2$                       | Zhuravlev, Lesokhin and Templeman<br>model          |
| <b>D6</b>       | $kt = [(1+\alpha)^{1/3}-1]^2$                         | Three-dimensional diffusion model (Anti-<br>Jander) |
| <b>D7</b>       | $k\ln t = [1-(1-\alpha)^{1/3}]^2$                     | Kroger and Ziegler model                            |
| <b>D8</b>       | $kt = [1-(1-\alpha)^{1/2}]^2$                         | Cylindrical diffusion model (Jander)                |
| <b>D9</b>       | $kt = [1-(1+\alpha)^{1/2}]^2$                         | Cylindrical diffusion model (Anti-Jander)           |
| <b>D10</b>      | $kt = [1/((1-\alpha)^{1/3})]-1$                       | Dickinson and Heal model                            |
| <b>D11</b>      | $kt = [1/((1-\alpha)^{1/3})]-1+1/3\ln(1-\alpha)$      | Dickinson and Heal model                            |
| <b>D12</b>      | $kt = 1/5(1-\alpha)^{-5/3}-1/4(1-\alpha)^{-4/3}+1/20$ | Dickinson and Heal model                            |
| <b>A1</b>       | $kt = [-\ln(1-\alpha)]^{1/4}$                         | Avrami-Erofeev model                                |
| <b>A2</b>       | $kt = [-\ln(1-\alpha)]^{1/2}$                         | Avrami-Erofeev model                                |
| <b>A3</b>       | $kt = [-\ln(1-\alpha)]^{1/3}$                         | Avrami-Erofeev model                                |
| <b>A4</b>       | $kt = [-\ln(1-\alpha)]^{4/3}$                         | Avrami-Erofeev model                                |
| <b>A5</b>       | $kt = [-\ln(1-\alpha)]^{2/3}$                         | Avrami-Erofeev model                                |
| <b>A6</b>       | $\ln k+n\ln t = \ln[-\ln(1-\alpha)]$                  | Avrami-Erofeev model                                |
| <b>F0</b>       | $kt = \alpha$                                         | Zero order                                          |
| <b>F1</b>       | $kt = -\ln(1-\alpha)$                                 | First order                                         |
| <b>F2</b>       | $kt = (1-\alpha)^{-1}$                                | Second order                                        |
| <b>R2</b>       | $kt = 1-(1-\alpha)^{1/2}$                             | Interface (contracting area)                        |
| <b>R3</b>       | $kt = 1-(1-\alpha)^{1/3}$                             | Interface (contracting volume)                      |
| <b>R4</b>       | $kt = 1-(1-\alpha)^{2/3}$                             | Interface                                           |
| <b>P1 (n=2)</b> | $kt = \alpha^{1/2}$                                   | Power law ( half)                                   |
| <b>P2 (n=3)</b> | $kt = \alpha^{1/3}$                                   | Power law ( third)                                  |
| <b>P3 (n=4)</b> | $kt = \alpha^{1/4}$                                   | Power law ( quarter)                                |
| <b>E1</b>       | $kt = \ln \alpha$                                     | Exponential                                         |
| <b>E2</b>       | $kt = [-\ln(1-\alpha)]^2$                             | Exponential                                         |
| <b>B1</b>       | $kt = \ln[\alpha/(1-\alpha)]$                         | Prout-Tompkins model                                |

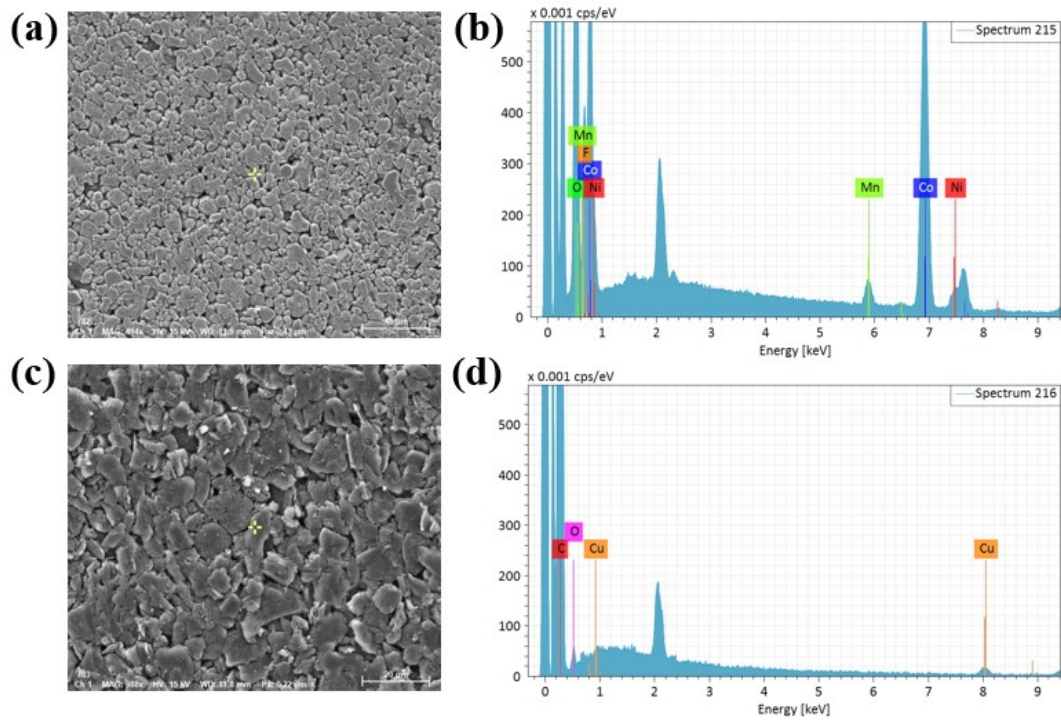

Fig.S4 SEM-EDX analysis of spent cathodes (a, b) and anodes (c, d).

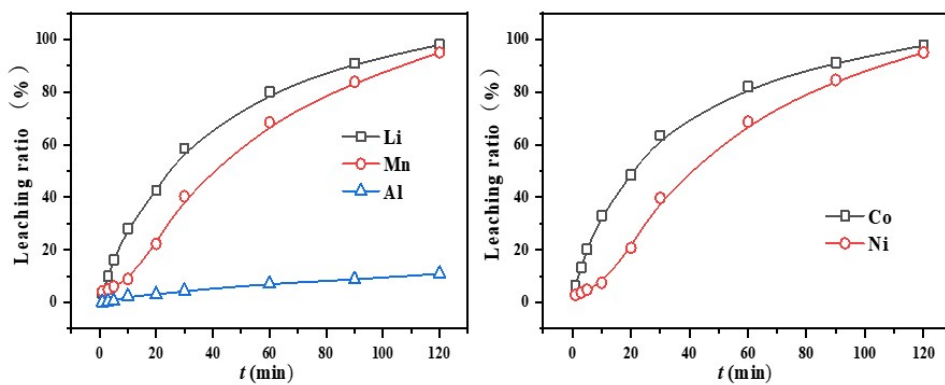

Fig.S5 The leaching ratios of (a) Li, Mn, Al, (b) Co, Ni under the optimum conditions (-0.15 V, 0.5M H<sub>2</sub>SO<sub>4</sub>, 400 rpm, 30 °C)

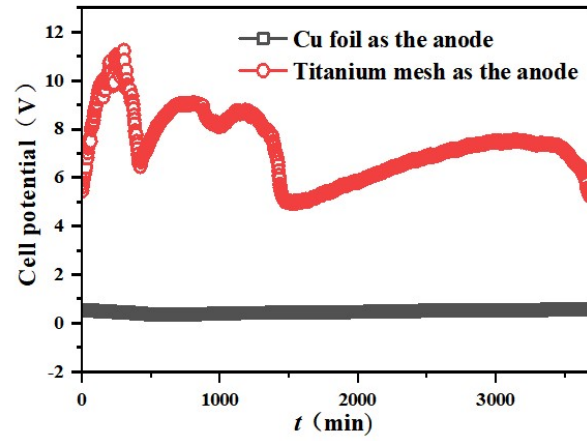

Fig. S6 the cell potential comparison for Cu foil as the anode and titanium mesh as the anode.

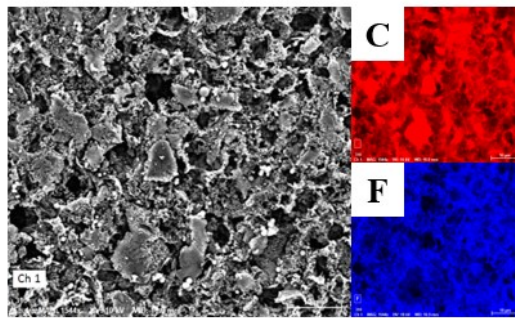

Fig.S7 SEM-EDX images of the cathode residuals.

Fig. S8a shows the cathode residuals mainly contain C (conductive agent and binder), F (residual electrolyte), Cu (Electrodeposition on the residuals), and Co (small amounts of unleached valued metals) elements. High-resolution and deconvoluted curves of Co (Fig. S8b) showed that  $2p_{3/2}$  orbitals at 779.76 eV and 780.84 eV were attributed to  $\text{Co}_3\text{O}_4$  and  $\text{CoO}$ , respectively, while the  $2p_{1/2}$  orbitals at 794.76 eV and 796.09 eV were both attributed to  $\text{Co}_3\text{O}_4$ , indicating two different existential status of cobalt in the leaching residual. Meanwhile, the O 1s orbitals (Fig. S8c) at 529.54 eV ( $\text{CoO}$ ) and 532.74 eV ( $\text{Co}_3\text{O}_4$ ), which verified the results of the peak fitting of Co elements.

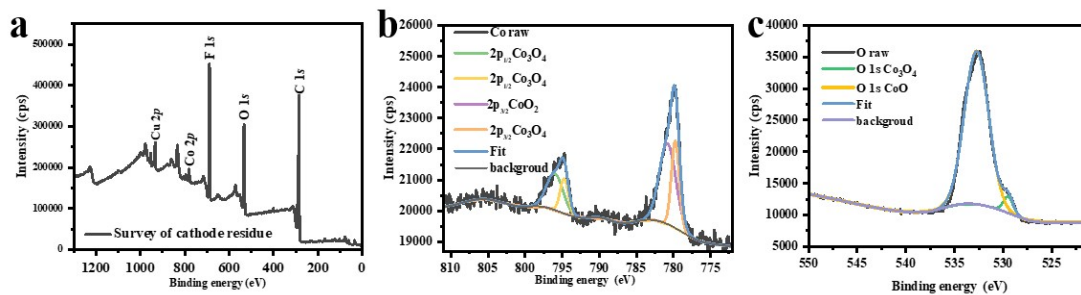

Fig.S8 XPS survey(a) and the deconvoluted high-resolution XPS curves of Co  $2p$  (b) and O  $1s$  (c) of the cathode residuals.

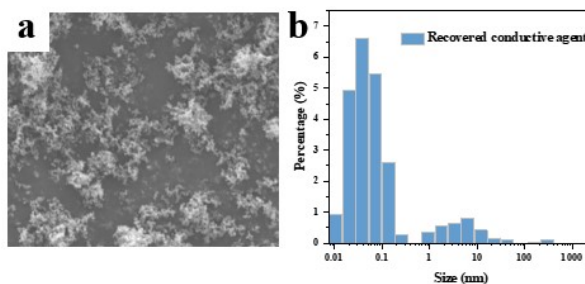

Fig.S9 Characterization of recovered conductive agent (a) SEM image, (b)size distributions.



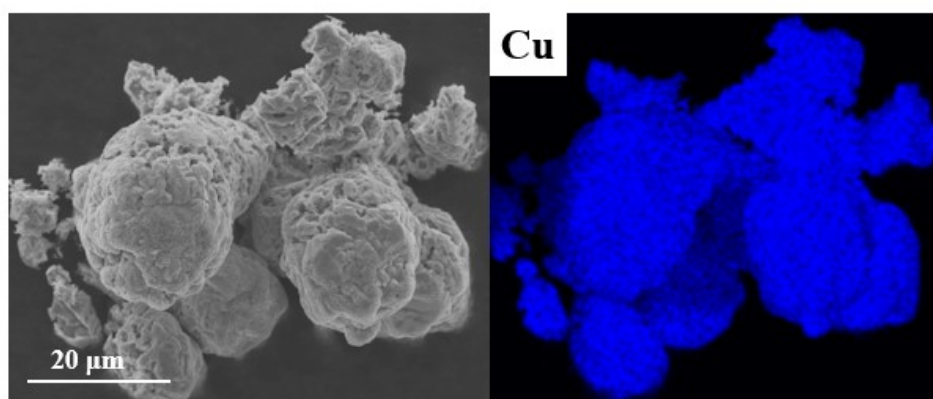

Fig.S10 SEM-EDX images of electrodeposited Cu.

Table S3 EDX results of the spent LIBs cathode materials.

| Element | Norm. C (wt. %) | Atom. C (at. %) |
|---------|-----------------|-----------------|
| Co      | 64.33           | 36.82           |
| O       | 25.30           | 53.33           |
| Ni      | 5.02            | 2.88            |
| Mn      | 2.19            | 1.35            |
| F       | 3.16            | 5.61            |

Table S4 EDX results of the spent LIBs anode materials.

| Element | Norm. C (wt. %) | Atom. C (at. %) |
|---------|-----------------|-----------------|
| C       | 95.35           | 97.72           |
| O       | 2.40            | 1.85            |
| Cu      | 2.25            | 0.44            |

### The calculation for life cycle and economic assessment

The environmental impact of the proposed and conventional electrochemical process was obtained by SimaPro9 software based on the CML-IA baseline model. Fig.S11 shows the system boundary diagram of the electrochemical process.

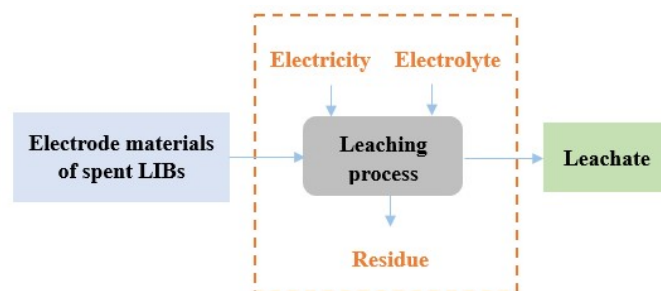

Fig.S11 System boundaries for LCA research of the electrochemical process.

Matter and energy inputs and outputs are listed according to the system boundary (Table S3). The data in Table S2 are based on the transfer of 50 mol of electrons (handling 1kg of cathode and 3.4kg of anode materials). To further compare the impact of electricity from the electrolysis, the evaluation was carried out again. A detailed energy list is shown in Table S4. The data in Table S4 are based on the 1kg of cathode materials. The electricity consumption of the process mainly comes from electrolysis and heating of the leaching solution, which is calculated according to Eq. (1~5).

$$Q = Q_t / \eta \quad (1)$$

$$Q_t = Q_h + Q_c \times t + Q_e \quad (2)$$

$$Q_h = mc\Delta T_1 \quad (3)$$

$$Q_c = \lambda A \Delta T_2 \quad (4)$$

$$Q_e = UIt \quad (5)$$

Where  $Q$  is electricity consumption in kJ;  $Q_t$  is the total energy consumption for time (t);  $\eta$  is the energy conversion efficiency of electricity to heat in this case 0.9;  $Q_h$  is the required energy for heating the solution to a certain temperature with the temperature difference (in K) in kJ;  $Q_c$  is the total energy loss by heat conduction caused by the temperature difference (in K) in kJ/h;  $Q_e$  is the required energy for electrolysis in kJ;  $m$  is the solution's mass in kg,  $c$  is the solution's specific heat capacity in kJ/(kg·K);  $\lambda$  is the container's heat transfer coefficient in kJ/(m<sup>2</sup>·K·h);  $A$  is the surface area of heat container in m<sup>2</sup>;  $U$  is the voltage during electrolysis;  $I$  is current during electrolysis.

Table S5 Material and energy input/output list.

|        | The proposed electrochemical process                                                                         | The conventional electrochemical process                                                                     |
|--------|--------------------------------------------------------------------------------------------------------------|--------------------------------------------------------------------------------------------------------------|
| Input  | H <sub>2</sub> SO <sub>4</sub> , 12.88 kg;<br>H <sub>2</sub> O, 268 kg;<br>Electricity consumption, 4.2 kW·h | H <sub>2</sub> SO <sub>4</sub> , 12.88 kg;<br>H <sub>2</sub> O, 268 kg;<br>Electricity consumption, 4.2 kW·h |
| Output | Residue, 0.2 kg                                                                                              | Residue, 3.6 kg                                                                                              |

Table S6 Detailed energy input/output list.

|        | The proposed electrochemical process                                                                         | The conventional electrochemical process                                                                       |
|--------|--------------------------------------------------------------------------------------------------------------|----------------------------------------------------------------------------------------------------------------|
| Input  | Electricity consumption from the electrolysis, 163 J;<br>Electricity consumption from the heating, 4.2 kW·h; | Electricity consumption from the electrolysis, 86.4 KJ;<br>Electricity consumption from the heating, 123 kW·h; |
| Output | Residue, 0.2 kg                                                                                              | Residue, 0.2 kg                                                                                                |

The economics of the proposed recycling route were evaluated with multiple parameters, i.e., leaching time (t), temperature (T), leaching ratio ( $LR_{i(t,T)}$ ), reagents consumption leaching profit (P(t, T)), labor costs, and energy costs as shown in Eq.(6)-(8). Eq. (8) was used for the convenience of calculation, not the real profit since all leached metals were not recovered in metallic form.

$$C_e = Q \times P_e / 3600 \quad (6)$$

$$P = \sum LR_{i(t,T)} \times UP_i - C_l - \sum R_j \times UP_j - C_e \quad (7)$$

Where  $C_e$  is the cost of heating with electricity in USD;  $P_e$  is the local electricity price in USD/kWh;  $C_l$  is the labor cost in USD;  $UP_i$  and  $UP_j$  represent the commodity market prices (CMP) of the product i and reagent j in USD/g;  $R_j$  is reagents j's consumption quantity in g; P is the overall profit of leaching, which is calculated by subtracting the sum of labor costs, energy costs, reagents costs ( $\sum R_j \times UP_j$ ) from the sum of leached critical metals prices ( $\sum LR_{i(t,T)} \times UP_i$ ). CMP of each product and reagent were shown in Table S5.

Table S7 CMP and data sources of each item.

| Items                          | CMP             | Sources (Accessed on 2022/12/26)                                                                                                                                                                                                                                                  |
|--------------------------------|-----------------|-----------------------------------------------------------------------------------------------------------------------------------------------------------------------------------------------------------------------------------------------------------------------------------|
| H <sub>2</sub> SO <sub>4</sub> | 0.3 USD/Kg      | <a href="https://www.made-in-china.com/video-channel/sjzxlwchem_cjpxkPZXIIhN_Sulfuric-Acid-Exporter-and-Supplier-Sulphuric-Acid-H2so4.html">https://www.made-in-china.com/video-channel/sjzxlwchem_cjpxkPZXIIhN_Sulfuric-Acid-Exporter-and-Supplier-Sulphuric-Acid-H2so4.html</a> |
| Li metal                       | 0.4207 USD/g    | <a href="https://hq.smm.cn/new-energy/list/11036">https://hq.smm.cn/new-energy/list/11036</a>                                                                                                                                                                                     |
| Co metal                       | 0.0467 USD /g   | <a href="https://hq.smm.cn/new-energy/list/11008">https://hq.smm.cn/new-energy/list/11008</a>                                                                                                                                                                                     |
| Al metal                       | 0.0027 USD /g   | <a href="https://hq.smm.cn/aluminum/category/201102250311">https://hq.smm.cn/aluminum/category/201102250311</a>                                                                                                                                                                   |
| Cu metal                       | 0.0094 USD /g   | <a href="https://hq.smm.cn/copper/list/178">https://hq.smm.cn/copper/list/178</a>                                                                                                                                                                                                 |
| Graphite                       | 0.0077 USD /g   | <a href="https://hq.smm.cn/new-energy/list/12028">https://hq.smm.cn/new-energy/list/12028</a>                                                                                                                                                                                     |
| NMP                            | 20 USD/ Kg      | <a href="https://www.echemi.com/searchGoods/pid_Seven17565-n-methyl-2-pyrrolidone.html">https://www.echemi.com/searchGoods/pid_Seven17565-n-methyl-2-pyrrolidone.html</a>                                                                                                         |
| Time cost                      | 3.4 USD/h       | The minimum hourly wage in Shanghai, China in 2022: <a href="http://rsj.sh.gov.cn/txcgl_17550/20201016/t0035_1394758.html">http://rsj.sh.gov.cn/txcgl_17550/20201016/t0035_1394758.html</a>                                                                                       |
| Electricity                    | 0.10342 USD/kWh | Electricity prices: <a href="https://www.globalpetrolprices.com/South-Korea/electricity_prices/">https://www.globalpetrolprices.com/South-Korea/electricity_prices/</a> .                                                                                                         |

Table S8 The environmental impact of electricity in the electrochemical process proposed in this study and the traditional method.

|                    | Impact category              | ADP (fossil fuels)   | GWP/kg CO <sub>2</sub> eq | ODP/kg CFC-11 eq       | HTP/kg 1,4-DB eq      | MAE/kg 1,4-DB eq |
|--------------------|------------------------------|----------------------|---------------------------|------------------------|-----------------------|------------------|
| This study         | Electricity for electrolysis | 3.8*10 <sup>-4</sup> | 3.52*10 <sup>-5</sup>     | 1.67*10 <sup>-12</sup> | 1.44*10 <sup>-5</sup> | 0.06             |
|                    | Electricity for heating      | 35.53                | 3.27                      | 1.55*10 <sup>-7</sup>  | 1.34                  | 5359.72          |
| Traditional method | Electricity for electrolysis | 0.21                 | 0.02                      | 8.81*10 <sup>-10</sup> | 0.01                  | 30.63            |
|                    | Electricity for heating      | 1040.78              | 95.79                     | 4.53*10 <sup>-6</sup>  | 39.06                 | 156963.27        |

Table S9 The environmental impact of residue in the electrochemical process proposed in this study and the traditional method.

|                    | Impact category | ADP (fossil fuels) | GWP/kg CO <sub>2</sub> eq | ODP/kg CFC-11 eq      | HTP/kg 1,4-DB eq | MAE/kg 1,4-DB eq |
|--------------------|-----------------|--------------------|---------------------------|-----------------------|------------------|------------------|
| This study         | Residue         | 0.14               | 0.57                      | 1.24*10 <sup>-9</sup> | 4.47             | 1102.59          |
| Traditional method | Residue         | 2.55               | 10.24                     | 2.24*10 <sup>-8</sup> | 80.55            | 19846.65         |
